# Supplementary material for: Therapeutic Potential of Ginsenosides as an Adjuvant Treatment for Diabetes
Source: Front Pharmacol. 2018 May 1;9:423. doi: 10.3389/fphar.2018.00423 (PMC5938666; doi:10.3389/fphar.2018.00423)
Supplement: Supplementary Table 1 — In vitro and in vivo Tests of Ginsenoside in the Treatment of DM. [file Table_1.XLSX]

## Sheet: Sheet1
Number	Research characteristics	Compounds	Animals/organs/Cells/tissues	Model of disease	Target	Effects	Reference
1	In Vivo Test	Rg1	high-fat-diet-fed male C57BL/6J mice	T2DM	FoxO1 and Akt	decreasing the hepatic glucose production	(Liu, Zhang et al. 2017)
	In Vitro Test		primary hepatocytes or HepG2 cells
2	In Vitro Test	Rb3	HepG2 cells	T2DM	AMPK, FOXO1 and HNF-4α	suppressing of gluconeogenesis	(Meng, Su et al. 2017)
3	InVivo Test	Compound K	high-fat diet combined with STZ injection male ICR mice	T2DM	AMPK, PGC-1α, HNF-4α and FOXO1	suppressing of hepatic gluconeogenesis	(Wei, Li et al. 2015)
	In Vitro Test		HepG2 cells
4	In Vivo Test	Rg3	high-fat diet-fed C57BL/6 mice	T2DM	STAT5-PPAR gamma pathway	improving insulin resistance and lipotoxicity	(Lee, Yoon et al. 2017)
	In Vitro Test		3T3-L1 cell line
5	In Vitro Test	Rk1+Rg5	3T3-L1	T2DM	endoplasmic reticulum stress	improving insulin resistance	(Ponnuraj, Siraj et al. 2014)
			cells
6	In Vivo Test	Rb1	high-fat diet-induced Female	T2DM	11β-HSD1	increasing insulin sensitivity	(Song, Ding et al. 2017)
			C57BL/C mice
7	In Vivo Test	Re	high-fat diet-induced C57BL/6 mice	T2DM with cognitive dysfunction	JNK pathway	improving insulin resistance	(Kim, Park et al. 2017)
8	In Vivo Test	Compound K	high-fat diet and streptozotocin induced male Wistar rats	T2DM	PI3K/Akt	improving insulin sensitivity	(Jiang, Ren et al. 2014)
9	In Vitro Test	Rg3	C2C12 cells	T2DM	mitochondrial function	improving insulin resistance in skeletal muscle	(Kim, Koo et al. 2016)
10	In Vivo Test	Rb1	Male db/db obese diabetic mice	Diabetic obesity	GLUT1 and GLUT4	promoting glucose consumption	(Shang, Guo et al. 2014)
	In Vitro Test		3T3-L1 adipocytes
11	In Vivo Test	Rg1	male C57BL/6 mice	——	EGFR-CREB signaling pathway and SGLT1	reducing glucose uptake	(Wang, Su et al. 2015)
	In Vitro Test		human intestinal Caco-2 cells
12	In Vitro Test	Protopanaxadiol-type ginsenosides(Rd, Rg3, Rh2, F2, and compound K)	HEK293 cells and Caco-2 cells	——	SGLT1	inhibiting of SGLT1	(Gao, Kushida et al. 2017)
13	In Vivo Test	Rg3	db/db mice and C57BL/6 mice	T2DM	GLP-1	stimulating GLP-1 secretion	(Kim, Jung Yang et al. 2015)
	In Vitro Test		NCI-H716
14	In Vivo Test	ginseng total saponins	high-fat diet and low-dose streptozotocin injection Male Sprague Dawley rats	T2DM	GLP1	stimulating GLP1 secretion	(Liu, Zhang et al. 2013)
	In Vitro Test	Ginseng total saponins, Rb1	NCI-H716
15	In Vitro Test	Compound K	MIN6	——	GLUT2	stimulating insulin secretion	(Gu, Li et al. 2013)
			cells
16	In Vivo Test	Malonyl ginsenosides	high-fat diet-fed and streptozotocin-induced diabetic male Wistar rats	T2DM	glucose homeostasis and glucose disposal	alleviating hyperglycemia, hyperlipidemia, and insulin resistance	(Liu, Li et al. 2013)
17	In Vitro Test	Rg3	islets from BALB/c mice	——	anti-apoptosis	enhancing islet cell function	(Kim, Jang et al. 2014)
18	In Vivo Test	Compound K	high-fat diet fed and streptozotocin induced male ICR mice	T2DM	AMPK-JNK pathway	preventing of β-cell apoptosis	(Guan, Gu et al. 2014)
	In Vitro Test		MIN6 cell line
19	In Vivo Test	Rg1	high-fat diet and intraperitoneal injection of streptozotocin male Sprague Dawley rats	T2DM patients with fatty liver disease	JNK	hepatoprotection, anti-apoptosis	(Tian, Chen et al. 2017)
20	In Vivo Test	Compound K	high-fat diet-fed OLETF rats	T2DM	AMPK	attenuating glucose intolerance	(Hwang, Oh et al. 2017)
21	In Vivo Test	Rb1	high-fat diet-induced C57Bl/6 male mice	Obesity	TNF-α, IL-6 and/or IL-1β, NF-κB pathway, SOCS3, and PTP1B	modulating obesity-induced inflammation and improving central leptin sensitivity	(Wu, Yu et al. 2014)
22	In Vitro Test	Rb2	LPS-stimulated RAW264.7 macrophages	——	GPR120	anti-inflammatory effect	(Huang, Wang et al. 2017)
23	In Vivo Test	Rg1	high-fat sugar diet and streptozotocin-induced Wistar rats	T2DM	endoplasmic reticulum (ER) stress and apoptosis	attenuating diabetic myocardial damage	(Yu, Zhen et al. 2016)
24	In Vivo Test	Rg1	high-fat diet and intraperitoneal injection of streptozotocin male Wistar rats	DM	SOD, catalase, glutathione peroxidase, caspase-3 and Bcl-xL	reducing oxidative stress and attenuating myocardial apoptosis	(Yu, Zhen et al. 2015)
25	In Vivo Test	Rh2	streptozotocin-diabetic male Sprague-Dawley rats	T1DM	PPARδ-STAT3 signaling	improving cardiac function and fibrosis	(Lo, Hsu et al. 2017)
	In Vitro Test		high glucose-cultured cardiomyocytes	——
26	In Vivo Test	Protopanaxadiol (PPD) and protopanaxatriol (PPT)-type saponins	high-fat diet/streptozotocin-induced C57BL/6 mice	T2DM	TNF-α, IL-6, SOD, MDA, PPAR-γ, phosphoenolpyruvate carboxykinase, glucose-6-phosphatase and microsomal TG transfer protein phosphoenolpyruvate carboxykinase, glucose-6-phosphatase and microsomal TG transfer protein	reducing inflammatory responses, regulating hepatic metabolism and lipid metabolism	(Deng, Liu et al. 2017)
27	In Vivo Test	Rb2	male db/db mice	T2DM	Sirt1 and AMPK pathways and autophagy	alleviating hepatic lipid accumulation, improved glucose tolerance	(Huang, Wang et al. 2017)
	In Vitro Test		HepG2 cells and primary mouse hepatocytes	——
28	In Vivo Test	Rg5	high-fat diet male C57BL/6J mice	DM	HIF-1α	combatting fatty acid oxidation and attenuatinf the hepatic glucagon response, prevention of hepatic gluconeogenesis	(Xiao, Lou et al. 2017)
	In Vitro Test		hepatocytes
29	In Vivo Test	Rg3	streptozotocin-induced male Sprague-Dawley rats	DM	caspase-3, bcl-2, bcl-xl, PECAM-1, and SMA	antioxidant effect	(Liu, Peng et al. 2015)
30	In Vivo Test	Compound K	high-fat diet and streptozotocin-induced rats	DM	MDA, GSH, SOD, GSH-PX, and TGF-β1	antioxidant effect	(Shao, Li et al. 2015)
31	In Vivo Test	20(S)-ginsenoside Rg3	high-sucrose, high-fat, and streptozotocin-induced male Wistar rats	T2DM	decreased 3-methylguanine, N2,N2-dimethylguanosine, acetoacetic acid and increased dodecanedioic acid, glycocholic acid, and trehalose 6-phosphate	regulating acid metabolism, energy metabolism, and gut flora metabolism	(Niu, Pi et al. 2012)
32	In Vivo Test	Rg1	high-fat feeding, streptozotocin, and one-sided carotid artery ligation induced male Sprague Dawley rats	diabetes complications with diabetic cerebral infarction	brain distribution, CEC migration and CEC tube formation	protected nerve tissue	(Shen, Zhao et al. 2017)
	In Vitro Test		cerebral vascular endothelial cell (CEC) line RBE4	——
33	In Vivo Test	Re	high‑sucrose‑high‑fat diet, alloxan monohydrate or streptozocin-induced adult male Wistar rats	early diabetes, T1DM, and T2DM	p38 MAPK, ERK1/2 and JNK signaling	protective and anti‑angiopathy effects	(Shi, Wan et al. 2016)
34	In Vivo Test	Rg3	high lipid diet and streptozotocin-induced male Sprague-Dawley rats	diabetic nephropathy	fatty acid metabolism pathway and PPARs signaling pathway	lipid/fatty acid metabolism	(Wang, Cui et al. 2016)
35	In Vivo Test	Rb1	high-fed died and streptozotocin male Sprague-Dawley rats	diabetes	increased intestinal permeability and intestinal microflora	increasing intestine absorption and inhibiting deglycosylation	(Liu, Hu et al. 2015)
	In Vitro Test		Caco-2 cells
36	In Vitro Test	Rd and R-Rh2	primary astrocytes	T2DM	cell viability, insulin signaling and inhibit apoptosis	protective astrocytes	(Chu, Lee et al. 2014)
37	In Vitro Test	Rb1	primary hippocampal neuronal	Diabetic cognitive dysfunction	ER stress-induced C/EBP homologous protein (CHOP)	anti-neurotoxicity	(Liu, Zhang et al. 2014)
38	In Vivo Test	Compound K	streptozotocin-induced C57BL/6 (H-2Kb) mice, BALB/c (H-2Kd) mice	T1DM	CD4(+), CD8(+) T cells, IL-2, interferon-γ, TGF-β, Foxp3 and NF-κB	immunosuppressive effect	(Ma, Jiang et al. 2014)
